# Supplementary material for: Hepatic Polarized Differentiation Promoted the Maturity and Liver Function of Human Embryonic Stem Cell-Derived Hepatocytes via Activating Hippo and AMPK Signaling Pathways
Source: MDPI journal article supplement (doi:10.3390/cells11244117), 2022-12-18
Supplement: s1 [file s1]

**Table S1.** Antibodies used in this study.

| Items                                   | Species reactivity | Providers                 | Cat. No.   |
|-----------------------------------------|--------------------|---------------------------|------------|
| PE anti-human SOX17 antibody            | human              | BD Biosciences            | 561591     |
| APC/Cy7 anti-human CXCR4 antibody       | human              | BioLegend                 | 306528     |
| Anti-ABCB11 (BSEP) antibody             | human              | BOSTER                    | PB9414     |
| Anti-SLC10A1/NTCP1 antibody             | human              | BOSTER                    | A06872-1   |
| ZO-1 (D6L1E) Rabbit mAb                 | human              | Cell Signaling Technology | 13663      |
| VE-Cadherin (D87F2) XP® Rabbit mAb      | human              | Cell Signaling Technology | 2500       |
| Phospho-YAP (Ser127) (D9W2I) Rabbit mAb | human              | Cell Signaling Technology | 13008      |
| YAP (D8H1X) XP® Rabbit mAb              | human              | Cell Signaling Technology | 14074      |
| Phospho-AMPK $\alpha$ (Thr172) Antibody | human              | Cell Signaling Technology | 2531       |
| AMPK Alpha 1 Polyclonal antibody        | human              | Proteintech               | 10929-2-AP |
| GAPDH Antibody                          | human              | Affinity Biosciences      | AF7021     |

**Table S2.** Primers used in this study.

| Gene          | Primer sequence (5'-3') □ □                                | Accession number |
|---------------|------------------------------------------------------------|------------------|
| <i>GAPDH</i>  | F- GAAGATGGTGTATGGGATTTC<br>R- GAAGGTGAAGGTCGGAGTC         | NM_001357943.2   |
| <i>BSEP</i>   | F- ACATGCTTGCGAGGACCTTTA<br>R- GGAGGTTCGTGCACCAGGTA        | XM_017005167.2   |
| <i>MRP2</i>   | F- TCTCTCGATACTCTGTGGCAC<br>R- CTGGAATCCGTAGGAGATGAAGA     | XM_017015675.3   |
| <i>MDR1</i>   | F- GGGATGGTCAGTGTGATGGA<br>R- GCTATCGTGGTGGCAAACAATA       | NM_001348945.2   |
| <i>CTGF</i>   | F- CTTGCGAAGCTGACCTGGAAGA<br>R- CCGTCGGTACATACTCCACAGA     | NM_001901.4      |
| <i>CYR61</i>  | F- GGAAAAGGCAGCTCACTGAAGC<br>R- GGAGATAACCAGTTCCACAGGTC    | NM_001554.5      |
| <i>CK18</i>   | F- TCGCAAATACTGTGGACAATGC<br>R- GCAGTCGTGTGATATTGGTGT      | NM_199187.2      |
| <i>CK19</i>   | F- AACGGCGAGCTAGAGGTGA<br>R- GGATGGTCGTGTAGTAGTGGC         | NM_002276.5      |
| <i>SOX17</i>  | F- GGCGCAGCAGAATCCAGA<br>R- CCACGACTTGCCAGCAT              | NM_022454.4      |
| <i>ALB</i>    | F- CTGCCTGCCTGTTGCCAAAGC<br>R- GGCAAGGTCCGCCCTGTCATC       | NM_000477.7      |
| <i>AFP</i>    | F- GGGAGCGGCTGACATTAT<br>R- TGTTTCATCCACCACCAA             | NM_001354717.2   |
| <i>HNF4A</i>  | F- GGTGTCCATACGCATCCTTGAC<br>R- AGCCGCTTGATCTTCCCTGGAT     | XM_047440138.1   |
| <i>G-6-P</i>  | F- CTTCTGGACACTGCATGATCACAG<br>R- CCAGTGCAGTCAACCCATAGAAGC | XM_011525474.4   |
| <i>CPS1</i>   | F- CTAGCCTGGATTACATGGTCACC<br>R- CCTCAAAGGTACGACCAATAGCC   | NM_001122633.3   |
| <i>FXR</i>    | F- TGGGGAAGTGA AATGACTC<br>R- ACAGGCAAAGTGTTGAGGAT         | XM_011539041.3   |
| <i>CYP7A1</i> | F- ATCCGACAGCTAAGGAGGATTTC<br>R- TCCCGATCCAAAGGGCATGTAGTA  | NM_000780.4      |
| <i>SHP</i>    | F- CCCAAGATGCTGTGACCTTTGAG<br>R- TGGGGTCTGTCTGGCAGTTG      | XM_011542297.4   |

**Figure S1**

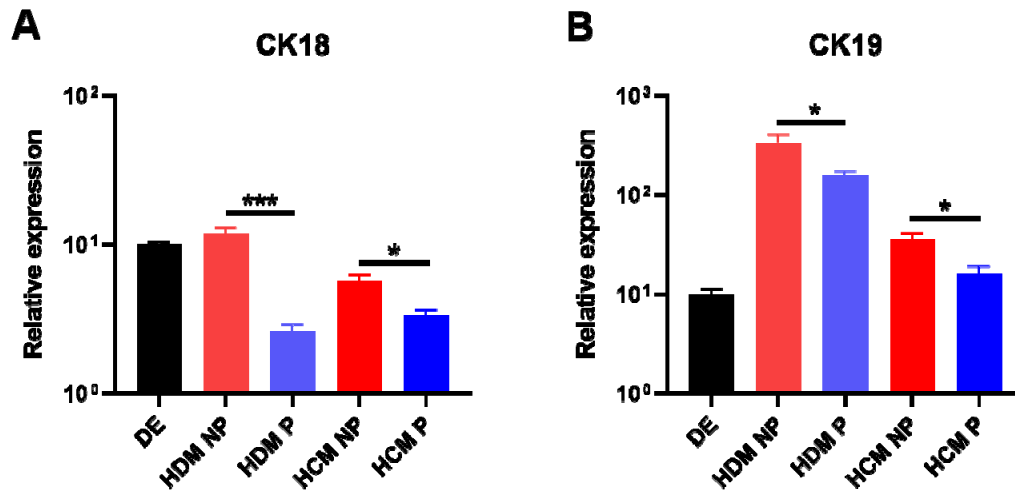

**Figure S1. Generation of the polarized hEHs through the transwell-based polarized differentiation**

**(A,B)** Quantitative PCR analysis of CK18 (A) and CK19 (B) in DE cells, the non-polarized hEHs and polarized hEHs cultured with HDM medium, the non-polarized hEHs and polarized hEHs cultured with HCM medium. Aforementioned cells were collected for quantitative PCR analysis at days 7, 21 and 27 during the hepatic differentiation. Relative gene expression represents data normalized to GADPH and calibrated to DE cells. Data represent the mean  $\pm$  SD. \*  $p < 0.05$ , \*\*  $p < 0.01$ , \*\*\*  $p < 0.001$ .

**Figure S2**

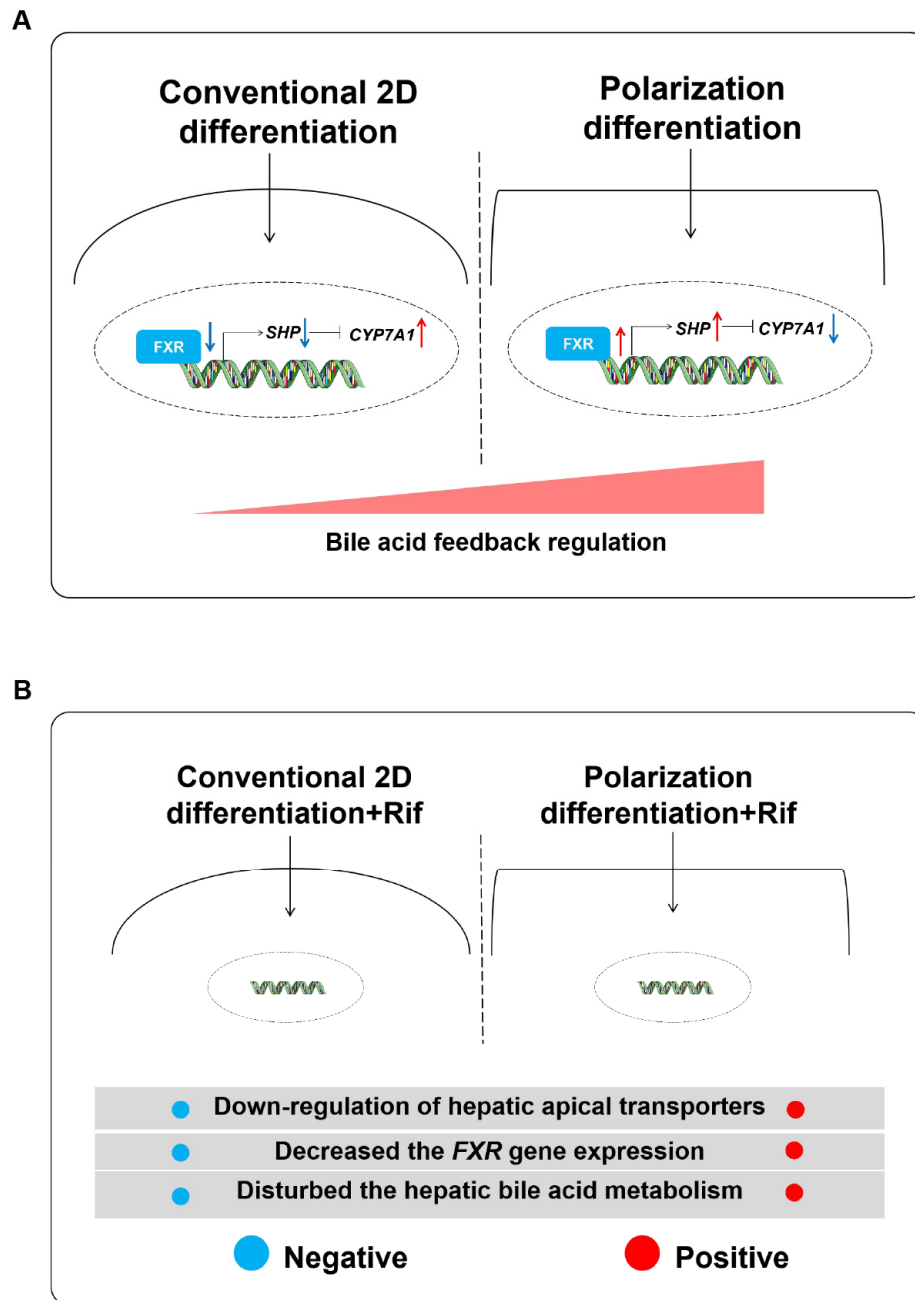

**Figure S2. The effects of polarized differentiation on the maturation and function of hEHs. (A)** Schematic representation the bile acid feedback regulation in non-polarized and polarized hEHs. **(B)** Schematic representation the polarized hEHs could mimic key phenotypes of drug-induced liver injury similarity to *in vivo* pathological progress.

**Figure S3**

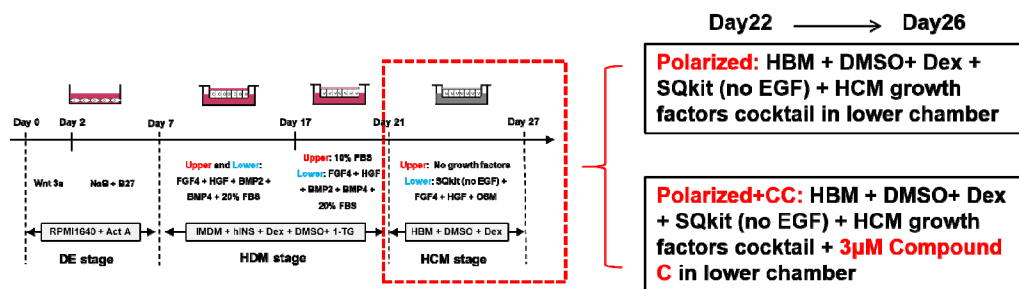

**Figure S3. Schematic representation the exprimental strategy for analysis of activation of AMPK signaling pathway invloved in polarity maintenance in polarized hEHs.** To verified whether the AMPK signaling pathway mediated the maintenance of the polarity in our polarized hEHs. We collected the polarized hEHs and treated with Compound C (CC), a specific inhibitor of AMPK, for 4 days during the maturation stage with HCM medium culture.
